# Supplementary material for: Theoretical investigation into the effect of water on the N2O decomposition reaction over the Cu-ZSM-5 catalyst
Source: Royal Society of Chemistry journal article supplement (doi:10.1039/d1cy01883c), 2022-01-01
Supplement: d1cy01883c1.pdf [file d1cy01883c1.pdf]

## Supporting Information

### Theoretical investigation into the effect of water on the N<sub>2</sub>O decomposition reaction over Cu-ZSM-5 catalyst

Kuyyilthodi M. Farhan, Ahammad N. K. Thabassum, Thufail M. Ismail and P. K. Sajith\*

Department of Chemistry, Farook College, Kozhikode-673632, Kerala, India

Email: pksajisiv@gmail.com; pksajith@farookcollege.ac.in

#### Table of Contents

**Fig. S1** 10-membered QM layer from the optimized geometries of intermediates and transition states involved in the N<sub>2</sub>O decomposition.

**Fig. S2** Structural changes and corresponding reaction energy barriers for N<sub>2</sub>O decomposition over 2T model dicopper active site of Cu-ZSM-5

**Fig. S3** Calculated singlet and triplet potential energy surface of decomposition of N<sub>2</sub>O over bare dicopper active site **(a)** In the absence of water **(b)** In the presence of coadsorbed water.

**Fig. S4** The complete energy profile diagram of **(a)** N<sub>2</sub>O decomposition in the absence of water **(b)** N<sub>2</sub>O decomposition in the presence of coadsorbed water.

**Fig. S5** Selected geometrical parameters of the representative structures of intermediates and transition states obtained at the ONIOM (B3LYP/6-311++G(d,p):UFF) level of theory.

**Fig. S6** Energy profile diagram for **(a)** Formation of [Cu-(OH)-Cu(OH)]<sup>2+</sup> centers **(b)** H<sub>2</sub>O assisted proton transfer, and **(c)** Regeneration of [Cu...Cu]<sup>2+</sup> obtained at the ONIOM (B3LYP/6-311++G(d,p):UFF) level of theory.



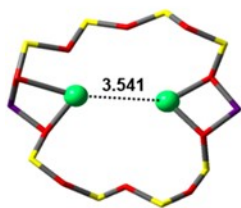

A<sub>(s)</sub>

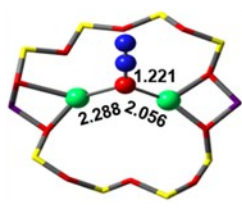

B<sub>(s)</sub>

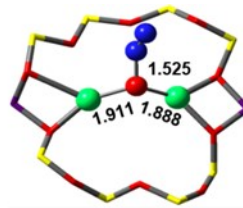

TS<sub>BC(s)</sub>

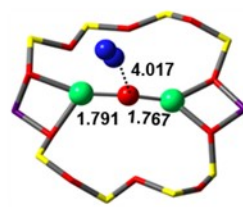

C<sub>(t)</sub>

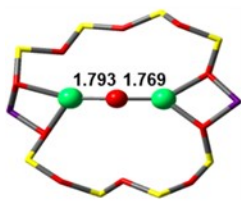

D<sub>(t)</sub>

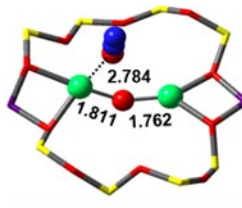

E<sub>(t)</sub>

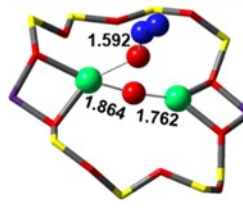

TS<sub>EF(t)</sub>

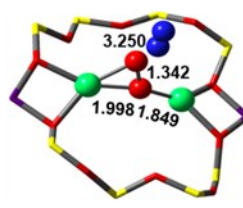

F<sub>(t)</sub>

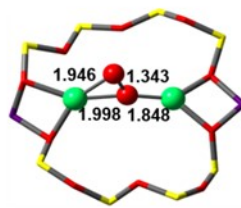

G<sub>(t)</sub>

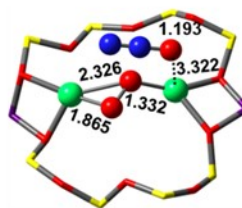

H<sub>(t)</sub>

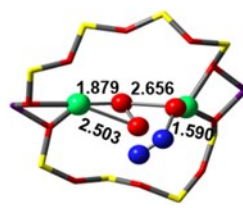

TS<sub>H(t)</sub>

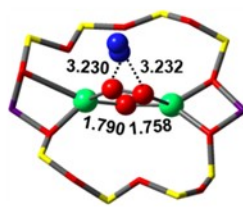

I<sub>(t)</sub>

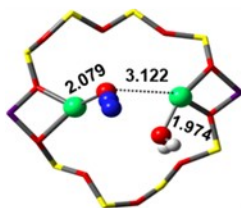

B<sub>w(s)</sub>

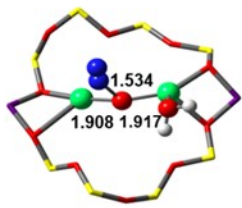

TS<sub>BCw(s)</sub>

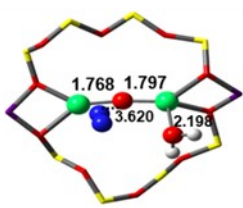

C<sub>w(t)</sub>

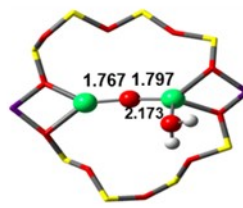

D<sub>w(t)</sub>

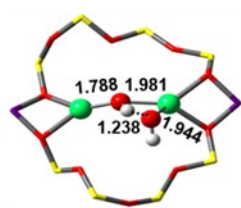

TS<sub>1W(t)</sub>

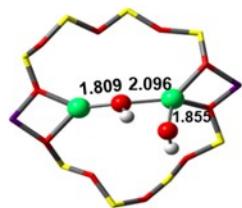

1<sub>w(t)</sub>

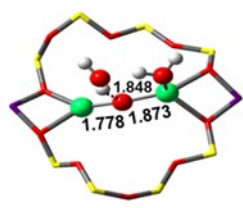

2<sub>w(t)</sub>

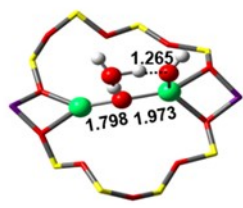

TS<sub>23W(t)</sub>

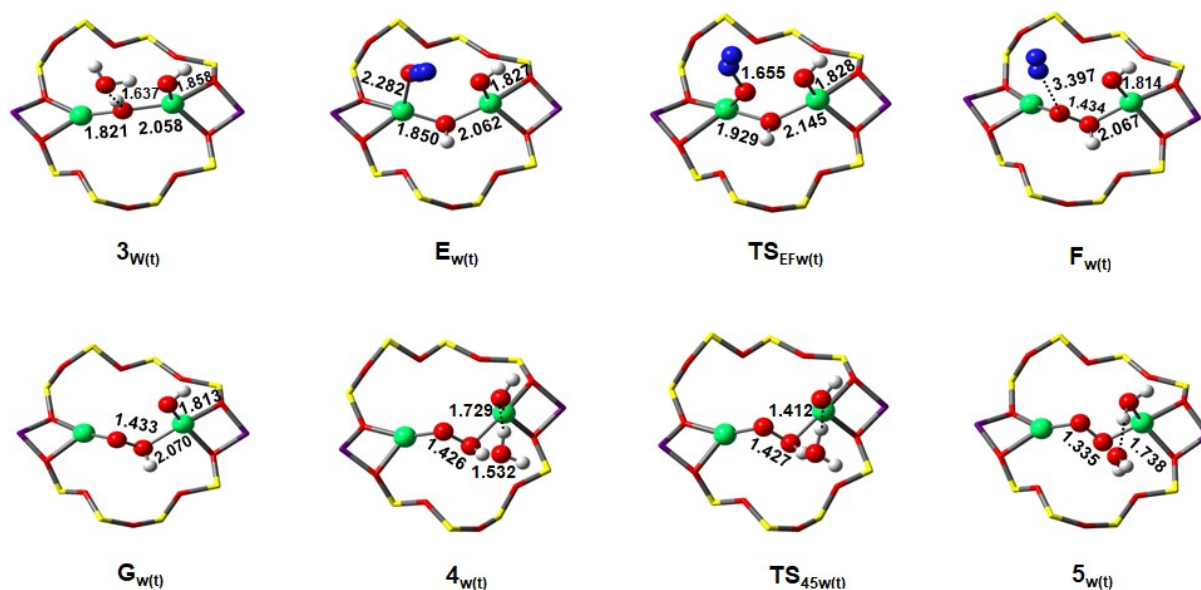

**Fig. S1** 10-membered QM layer from the optimized geometries of intermediates and transition states involved in the  $N_2O$  decomposition. Selected bond distances are in Å.

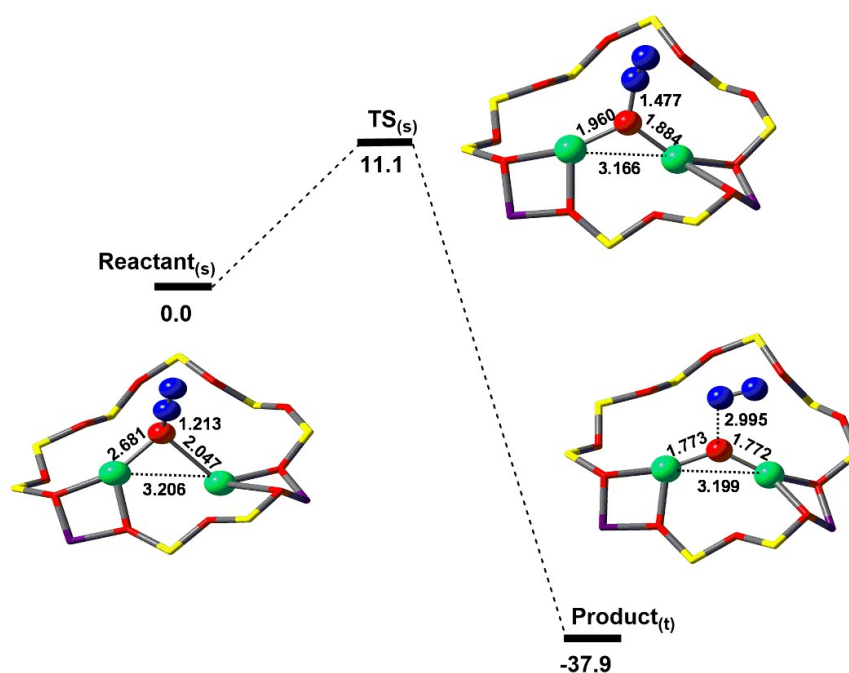

**Fig. S2** Structural changes and corresponding reaction energy barriers for  $N_2O$  decomposition on  $2T$  model. The relative energies are in kcal/mol. The selected bond distances are in Å. The spin state of the corresponding structure is given in parentheses, where s and t represent closed-shell singlet and triplet state, respectively.

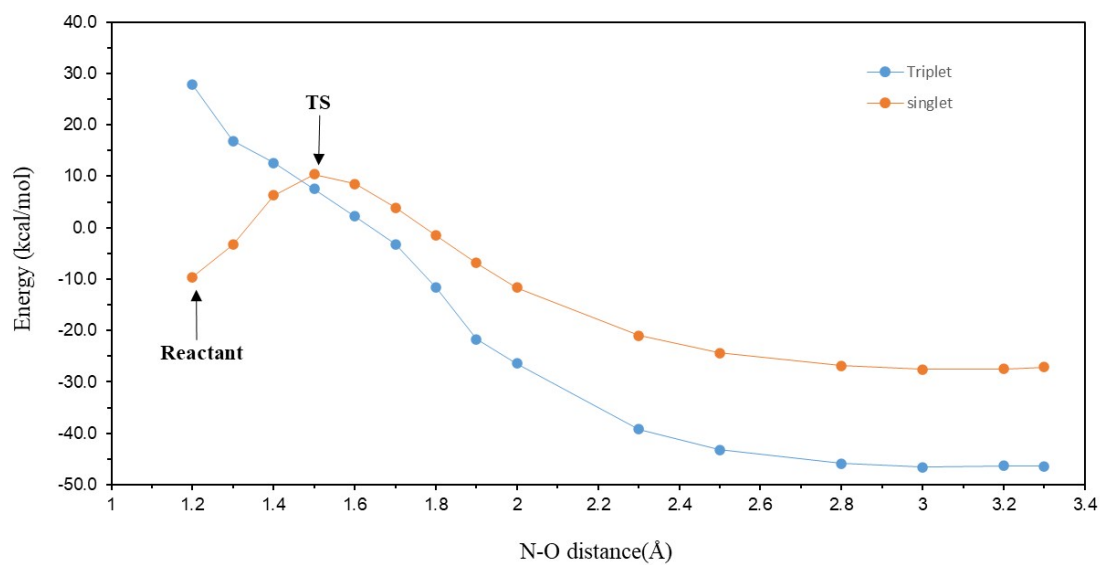

(a)

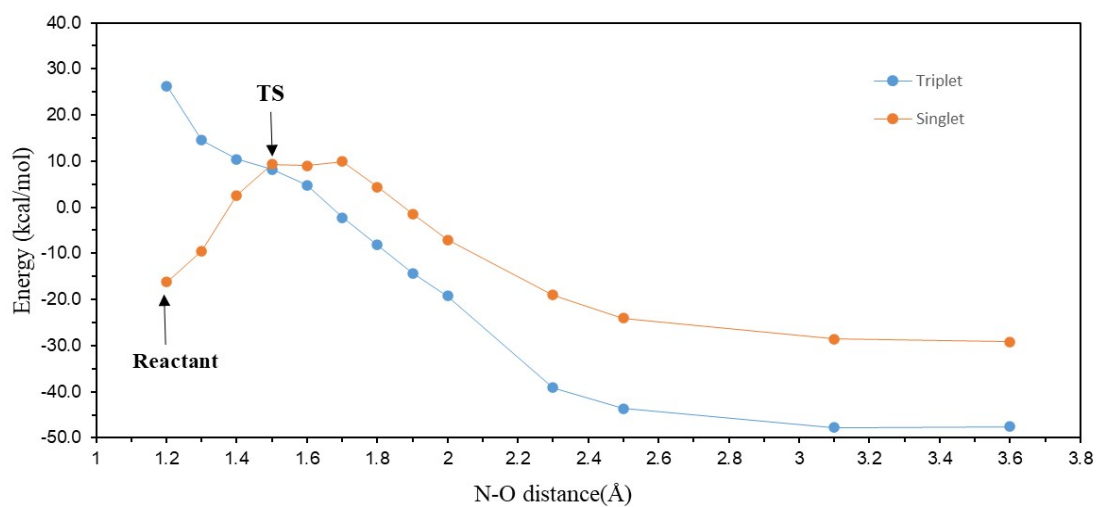

(b)

**Fig. S3** Calculated singlet and triplet potential energy surface of decomposition of  $N_2O$  over bare dicopper active site **(a)** In the absence of water **(b)** In the presence of coadsorbed water.

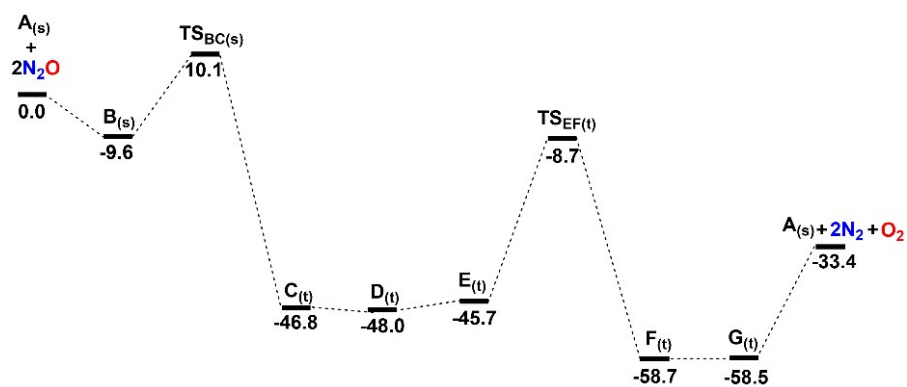

(a)

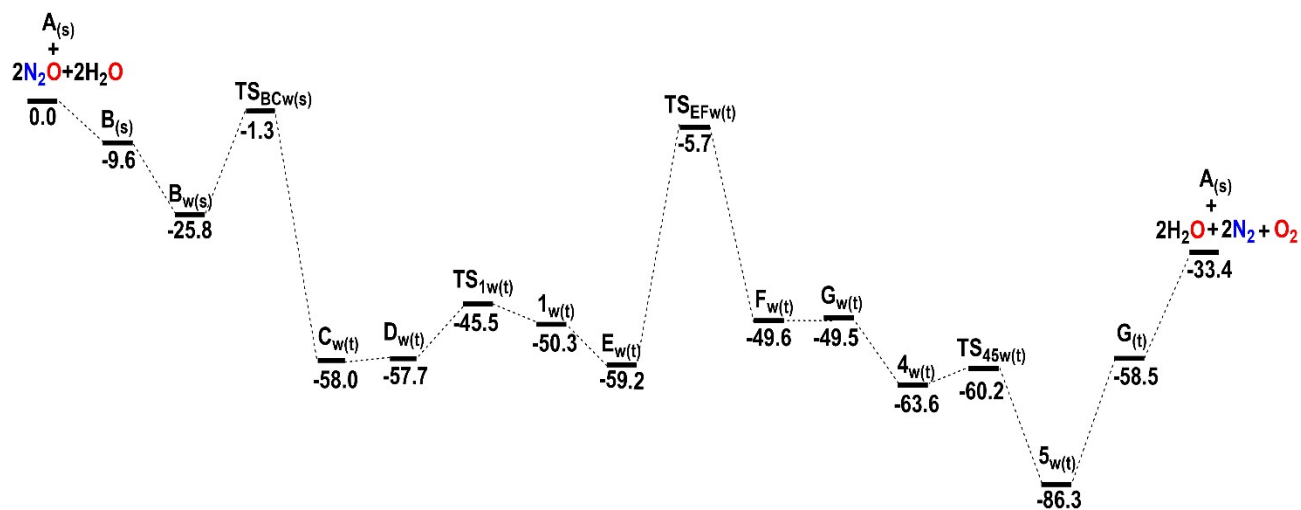

(b)

**Fig. S4** The overall energy profile diagram of (a)  $\text{N}_2\text{O}$  decomposition in the absence of water (b)  $\text{N}_2\text{O}$  decomposition in the presence of coadsorbed water. The relative energies are in kcal/mol.

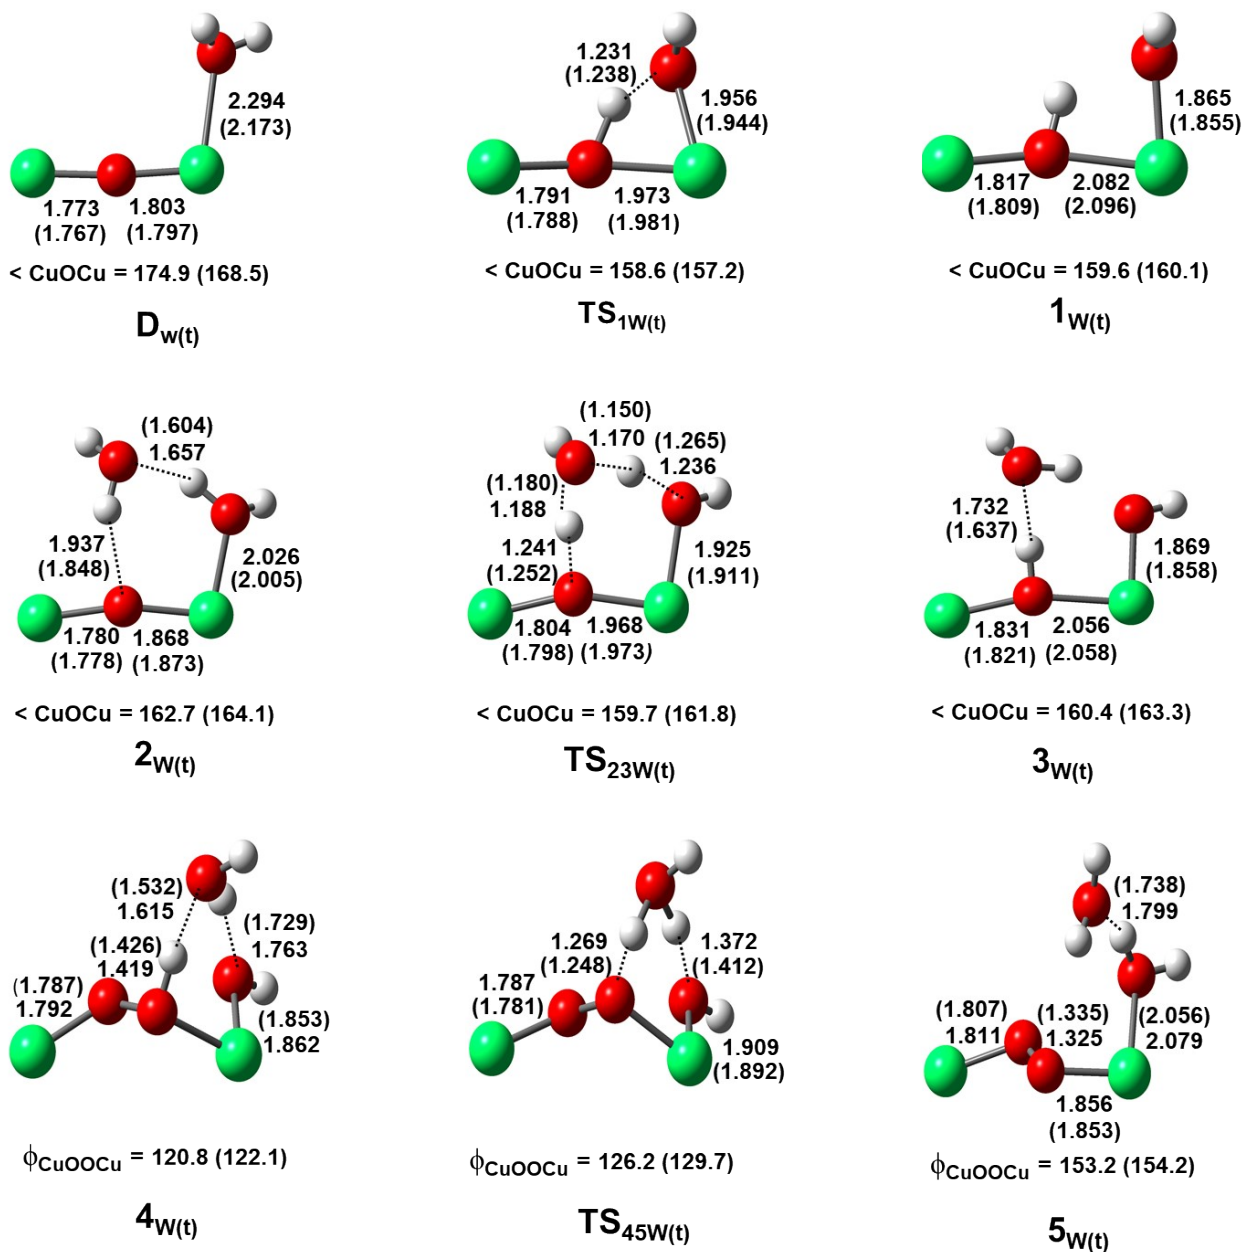

**Fig. S5** Selected geometrical parameters of the representative structures of intermediates and transition states calculated at the ONIOM (B3LYP/6-311++G(d,p):UFF) level of theory. The selected bond distances (Å) and angles (degree) are indicated. The values in parentheses show the corresponding values obtained at the ONIOM (B3LYP/GEN:UFF) level of theory.

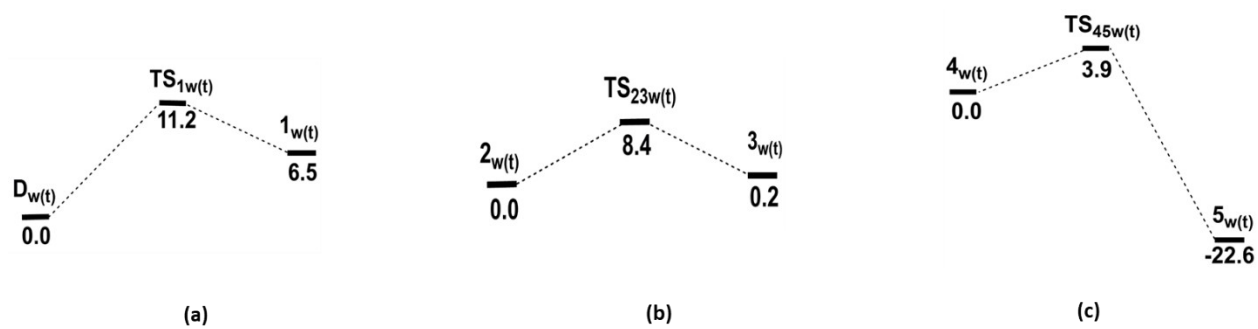

**Fig. S6** Energy profile diagrams for (a) Formation of  $[\text{Cu}-(\text{OH})-\text{Cu}(\text{OH})]^{2+}$  centers (b)  $\text{H}_2\text{O}$  assisted proton transfer, and (c) Regeneration of  $[\text{Cu}\dots\text{Cu}]^{2+}$  calculated at the ONIOM (B3LYP/6-311++G(d,p):UFF) level of theory. All values are in kcal/mol.
